# Supplementary material
Source: publisher figshare collection journal article supplement (https://acs.figshare.com/ndownloader/files/25680316)
Supplement: Supplementary file 1 [file 25680316]

---

## Supporting Information

# Corrosion-Resistant Crosslinked Cyanate Ester Coatings Doped by Graphene Oxide for Use in High-Temperature Marine Environments

*Junwei Chang<sup>a, b</sup>, Zhenyu Wang<sup>b, c\*</sup>, En-hou Han<sup>b, c\*</sup>, Qian Liu<sup>a, b</sup>, Shuai Wang<sup>b</sup>*

<sup>a</sup> School of Materials Science and Engineering, University of Science and Technology of China, Hefei 230026, P. R. China

<sup>b</sup> Key Laboratory of Nuclear Materials and Safety Assessment, Institute of Metal Research, Chinese Academy of Sciences, Shenyang 110016, P. R. China

<sup>c</sup> Institute of Corrosion Science and Technology, Guangzhou 510000, P. R. China

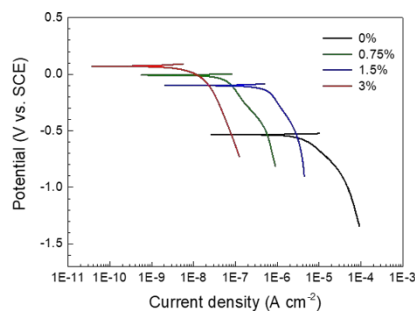

**Figure S1.** Potentiodynamic polarization curves for pristine CE coating, 0.75 wt.%, 1.5 wt.% and 3 wt.% GO/CE coatings on Q235 steel after immersion in 3.5 wt.% NaCl solution for 1320 h.

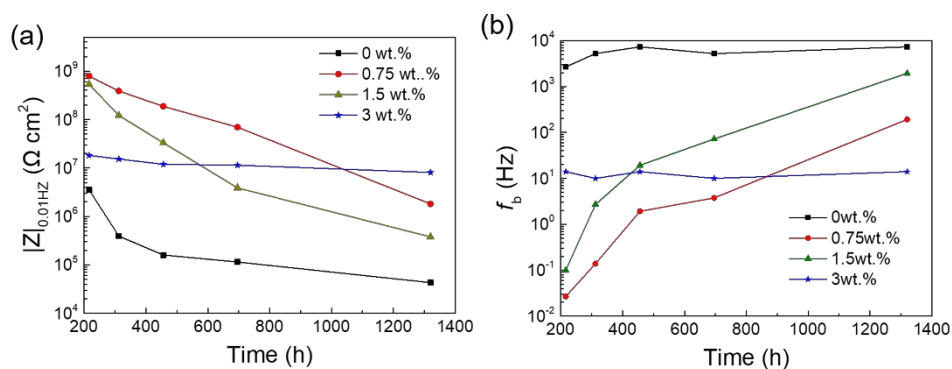

**Figure S2.** Low frequency impedance modulus at 0.01 Hz (a) and breakpoint frequency (b) of pristine CE coating, 0.75 wt.%, 1.5 wt.% and 3 wt.% GO/CE coatings with immersion time prolonging.

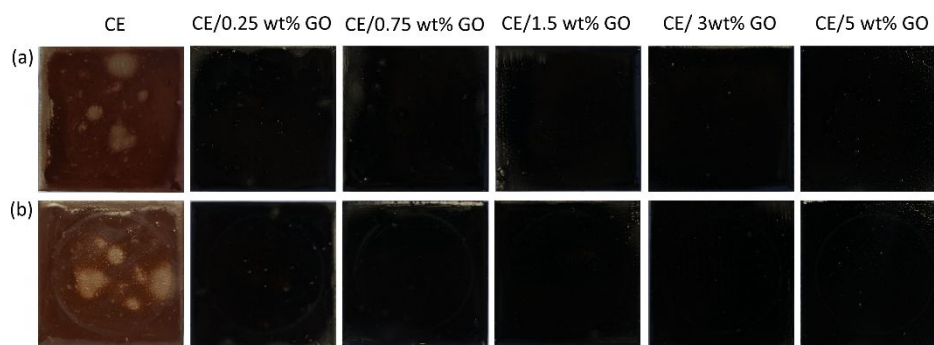

**Figure S3.** Photo-digital images of different CE or GO/CE coated specimens before (a) and after (b) immersion in 3.5 wt.% NaCl solutions.

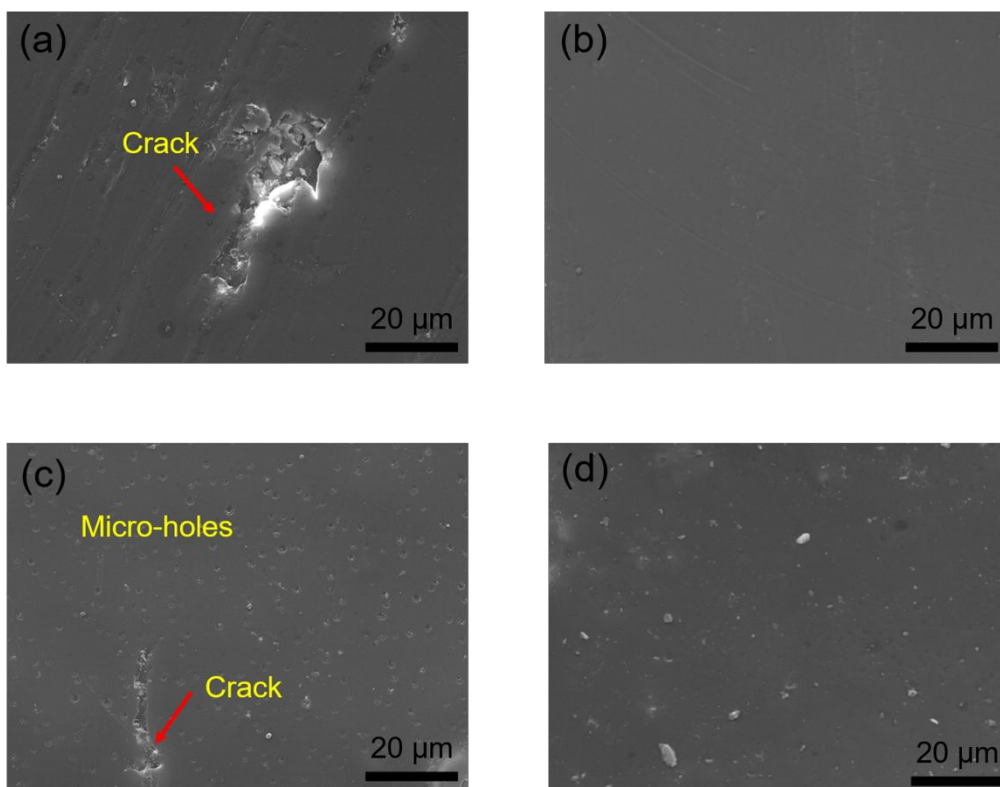

**Figure S4. Surface morphology.** Top-view SEM images of pristine CE coating (a), 0.75 wt.% (b), 1.5 wt.% (c) and 3 wt.% (d) GO/CE coating immersed in 3.5 wt.% NaCl solution for 1320 h.

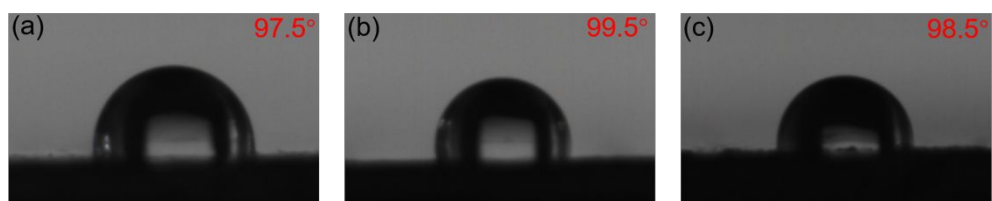

**Figure S5.** Contact angle of pristine CE coating (a), 1.5 wt.% GO/CE coating (b) and 3 wt.% GO/CE coating (c).

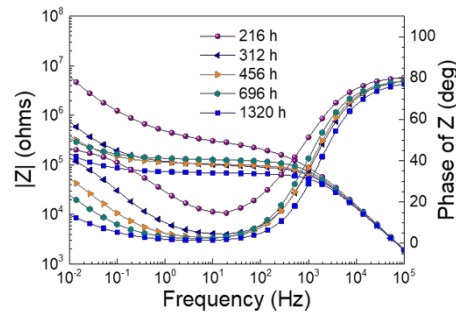

**Figure S6.** Bode modulus and phase angle diagrams of 0.75 wt.% GO/CE coatings on Q235 steel immersed in 3.5 wt.% NaCl solution from 216 h to 1320 h.

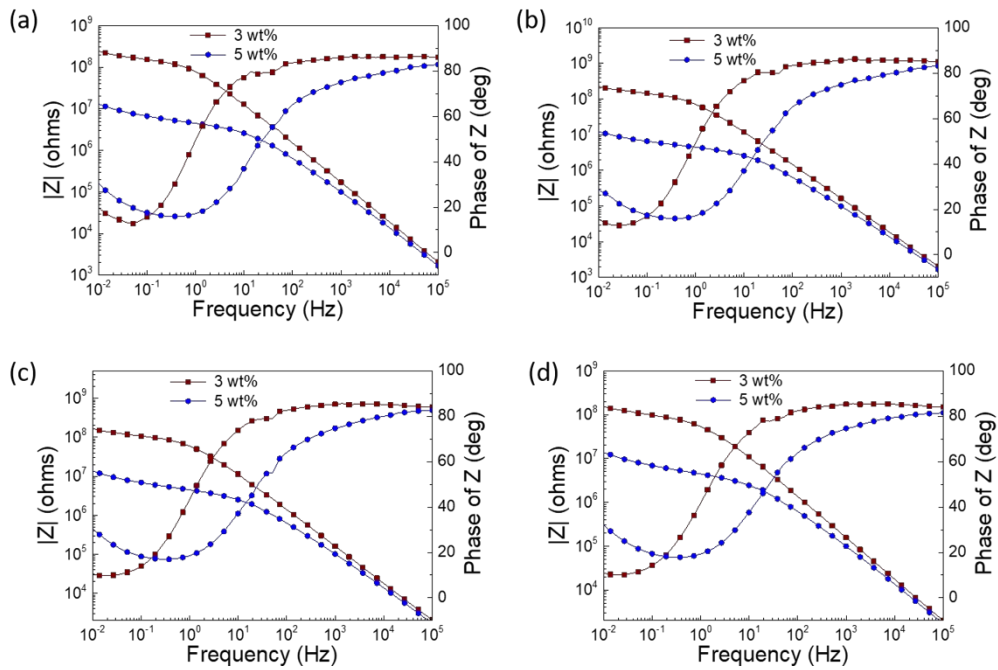

**Figure S7.** Bode modulus and phase angle diagrams of 3 wt.% and 5 wt.% GO/CE coatings on Q235 steel immersed in 3.5 wt.% NaCl solution for 48 h (a), 96 h (b), 144 h (c) and 216 h (d), respectively.

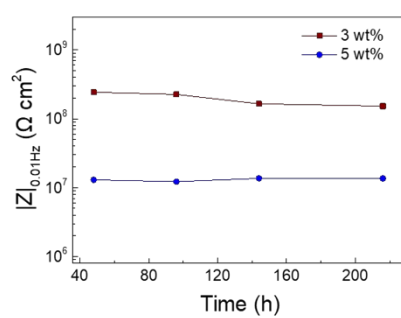

**Figure S8.** Low frequency impedance modulus at 0.01 Hz of 3 wt.% and 5 wt.% GO/CE coatings with different immersion time.

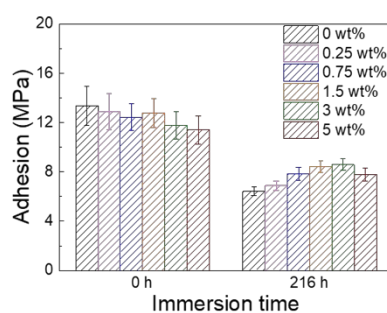

**Figure S9.** Adhesions of six different coatings before and after immersion in 3.5 wt.% NaCl solutions for 216 h.

---

**Table S1.** The heating temperature and corresponding heating time during the whole curing process.

| Temperature (°C) | Heating time (hours) |
|------------------|----------------------|
| 50               | 2                    |
| 70               | 1                    |
| 100              | 1                    |
| 150              | 1                    |
| 180              | 2                    |
| 200              | 2                    |
| 240              | 1                    |

**Table S2.** Polarization parameters for pristine CE coating, 0.75 wt.% ,1.5 wt.% and 3 wt.% GO/CE coatings immersed in 3.5 wt.% NaCl solution for 1320 h.

| GO content | $E_{\text{corr}}$ (mV vs.<br>SCE) | $I_{\text{corr}}$ ( $\mu\text{A cm}^{-2}$ ) | Corrosion rate (mm per<br>year) |
|------------|-----------------------------------|---------------------------------------------|---------------------------------|
| 0 wt. %    | -534.9                            | 3.90                                        | $1.42 \times 10^{-1}$           |
| 0.75 wt. % | -8.24                             | $5.63 \times 10^{-2}$                       | $2.05 \times 10^{-3}$           |
| 1.5 wt. %  | -99.94                            | $5.30 \times 10^{-1}$                       | $1.93 \times 10^{-3}$           |
| 3 wt. %    | 70.78                             | $1.74 \times 10^{-2}$                       | $6.33 \times 10^{-4}$           |

**Table S3.** O<sub>2</sub> gas permeability of pristine CE and 3 wt.% GO/CE composite membranes.

| Sample       | O <sub>2</sub> permeability coefficient ( $\text{cm}^3 \cdot \text{cm} / \text{cm}^2 \cdot \text{s} \cdot \text{Pa}$ ) |
|--------------|------------------------------------------------------------------------------------------------------------------------|
| pristine CE  | $9.95 \times 10^{-12}$                                                                                                 |
| 3 wt.% GO/CE | $1.76 \times 10^{-12}$                                                                                                 |
